# Supplementary material for: Facile synthesis of microporous sulfur-doped carbon spheres as electrodes for ultrasensitive detection of ascorbic acid in food and pharmaceutical products
Source: Royal Society of Chemistry journal article supplement (doi:10.1039/c7nj05047j), 2018-01-01
Supplement: c7nj05047j1.pdf [file c7nj05047j1.pdf]

# Facile synthesis of microporous sulfur-doped carbon spheres as electrodes for ultrasensitive detection of ascorbic acid in food and pharmaceutical products

Mohammed Y. Emran,<sup>a,b</sup> Mohammed A. Shenashen,<sup>a</sup> Adel A. Abdelwahab,<sup>b</sup> Mohamed Abdelmottaleb,<sup>b</sup> Sherif A. El-Safty,<sup>a,c</sup>

<sup>a</sup>National Institute for Materials Science (NIMS), 1-2-1 Sengen, Tsukuba-shi, Ibaraki-ken, 305-0047, Japan

<sup>b</sup>Department of Chemistry, Faculty of Science, Al-Azhar University, Assiut 71524, Egypt.

<sup>c</sup>Faculty of Engineering and Advanced Manufacturing, University of Sunderland, Sunderland SR6 0DD, UK.

\*E-mail: [sherif.elsafty@nims.go.jp](mailto:sherif.elsafty@nims.go.jp) & [sherif.el-safty@sunderland.ac.uk](mailto:sherif.el-safty@sunderland.ac.uk)

## Supplementary materials

### 1-Experimental

#### 1.1 Materials

All chemicals were of analytical grade and were used without further purification. Sodium Dopamine hydrochloride, uric acid (UA), Glucose (Gl) and potassium ferricyanide [K<sub>3</sub>Fe(CN)<sub>6</sub>], human blood serum, and potassium chloride (KCl) were purchased from Sigma–Aldrich Company, Ltd., USA. L(+)-ascorbic acid (AA), disodium hydrogen phosphate (Na<sub>2</sub>HPO<sub>4</sub>), citric acid, sodium dihydrogen phosphates (NaH<sub>2</sub>PO<sub>4</sub>), sodium carbonate (Na<sub>2</sub>CO<sub>3</sub>), sodium chloride (NaCl), potassium sulfate (K<sub>2</sub>SO<sub>4</sub>), sodium hydrogen sulfate (NaHSO<sub>4</sub>), thiourea and H<sub>2</sub>O<sub>2</sub> (30%) were purchased from Wako Company, Ltd., Osaka, Japan.

#### 1.2 Fabrication of working electrode

A dispersed solution of working materials was prepared as follows; 5 mg of S-MCMS-700, S-MCMS-800, and S-MCMS-900 were dispersed in 1 mL Milli-Q water and further used for electrode modifications. The glassy carbon electrode (GCE, diameter 4.0 mm) was

successively polished to a mirror using 0.05  $\mu\text{M}$  alumina slurry, then diamond slurry with washing by deionized water every sweep, after that it sonicated in acetone and double-distilled water, and dried at room temperature. The electrode design was fabricated by drop casting of 20  $\mu\text{L}$  of S-MCMS-700, S-MCMS-800, and S-MCMS-900 onto the surface of GCE and dried at room temperature

### **1.3 Electrochemical sensing system**

Zennium/ZAHNER-Elektrik instrument that was controlled by Thales Z 2.0 software at room temperature was used for all electrochemical measurements. A conventional three-electrode system containing GCE (3 mm) as working electrodes, platinum wires as a counter electrode, and Ag/AgCl (3 M NaCl) as a reference electrode were used for electrochemical analysis. The modified electrode was activated under continuous cyclic voltammetric sweep for 10 cycles from 0.0 to 2 V at scan rate  $100 \text{ mVs}^{-1}$  in 0.1 M PBS (pH 6.4).

### **1.4 Characterization analyses**

The morphology of the annealed sample was investigated by FE-SEM (JEOL Model 6500) at 20 kV. Analysis material was fixed onto the FE-SEM stage using carbon tape before insertion into the FE-SEM chamber. The ion sputter (Hitachi E-1030) was used to deposit thin-layered Pt films on electrodes at 25  $^{\circ}\text{C}$ .

The surface properties of the material involving the pore structure distribution and surface area were estimated by  $\text{N}_2$  adsorption at 77 K using a BELSORP36 analyzer (JP. BEL Co., Ltd.). The samples were thermally treated at 200  $^{\circ}\text{C}$  for at least 6 h under  $\text{N}_2$  atmosphere. The specific surface area (SBET) was calculated using the Brunauer–Emmett–Teller (BET) method with multipoint adsorption data from the linear section of the  $\text{N}_2$  adsorption isotherm. The pore size distribution was determined using nonlocal DFT (NLDFT).

The structural geometry of the catalyst was further examined by WA-XRD. The WA-XRD patterns were recorded using an 18 kW diffractometer (Bruker D8 Advance) at a scan rate of  $10^{\circ}/\text{min}$  with monochromated  $\text{CuK}\alpha$ -X-radiation ( $\lambda = 1.54178 \text{ \AA}$ ). The DIFRAC plus Evaluation Package (EVA) software with the PDF-2 Release 2009 databases provided by Bruker AXS was used to analyze the diffraction and structure analysis diffraction data. The TOPAS package program was applied to integrate several types of X-ray diffraction (XRD) analyses.

XPS analysis was conducted on a PHI Quantera SXM (ULVAC-PHI) instrument (Perkin–Elmer Co., USA) equipped with Al  $\text{K}\alpha$  as an X-ray source for excitation ( $1.5 \text{ mm} \times 0.1 \text{ mm}$ ,

15 kV, 50 W) under a pressure of  $4 \times 10^{-8}$  Pa. A thin film of the sample was deposited on a Si slide before the start of analysis.

Raman spectroscopy (HR Micro Raman spectrometer, Horiba, Jubin Yvon) was conducted using an Ar ion laser at 633 nm. A CCD (charge coupled device) camera detection system and the LabSpec-3.01C software package were used for data acquisition and analysis, respectively. To ensure the accuracy and precision of the Raman spectra, 10 scans of 5 s at from  $450 \text{ cm}^{-1}$  to  $2900 \text{ cm}^{-1}$  were recorded.

## **2. Results and discussion**

### **2.1 pH-dependent AA behavior on S-MCMS-900-modified electrode**

One of the factors that affect electrochemical reaction is the pH-supporting electrolyte solution. The pH effect of AA (0.5 mM) on the S-MCMS-900-modified electrode was studied using CV in 0.1 mM PBS from pH 5 to 7.4 at a scan rate of  $100 \text{ mVs}^{-1}$  (Fig. S1A). The oxidation peak currents of AA increased gradually from pH 5 to pH 6.4 and then decreased until pH 7.4. Consequently, the anodic peak current  $I$  ( $\mu\text{A}$ ) was the highest value at pH 6.4, so pH=6.4 was selected as the optimum supporting electrolyte that produces the highest catalytic pH supporting electrolyte.<sup>1, 2</sup> Figure S1B shows that the AA redox peak potential shifted negatively with increasing pH from 5 to 7.4. By plotting the pH versus  $E$  (V), a linear relationship was obtained with regression equation  $\text{pH} = 0.455 - 0.031 E(\text{V})$  with  $R^2 = 0.931$ , where the slope = 0.031 mV. The negative shift with varying pH of supporting electrolyte may relate to the proton sharing on the electrooxidation reaction of AA; moreover, the number of protons equals to the number of electrons evolved in the redox process, which is very close to the theoretical Nernst value of 59 mV.<sup>2-6</sup>

### **2.2 Scan rate effect of AA on S-MCMS-900-modified electrode**

The electrochemical oxidation of AA at the S-MCMS-900-modified electrode with varying scan rates was investigated to evaluate the kinetic surface process using CV in 0.1 M PBS (pH 6.4) containing 0.5 mM AA. Figure S1C shows the CVs of S-MCMS-900 in 0.5 mM AA at varying scan rates from 20–300  $\text{mVs}^{-1}$ , where the oxidation peak current increased with increasing scan rate. A linear relationship between the current and the scan rate was observed in the regression equation ( $I$  ( $\mu\text{A}$ ) =  $3.4 + 0.046v$

$\text{mVs}^{-1}$ ),  $R^2 = 0.98$  (Fig. S1D). These results illustrate that the overall process of AA at the active sites of S-MCMS-900 is a typical controlled adsorption process.<sup>2, 4-6</sup>

Figures

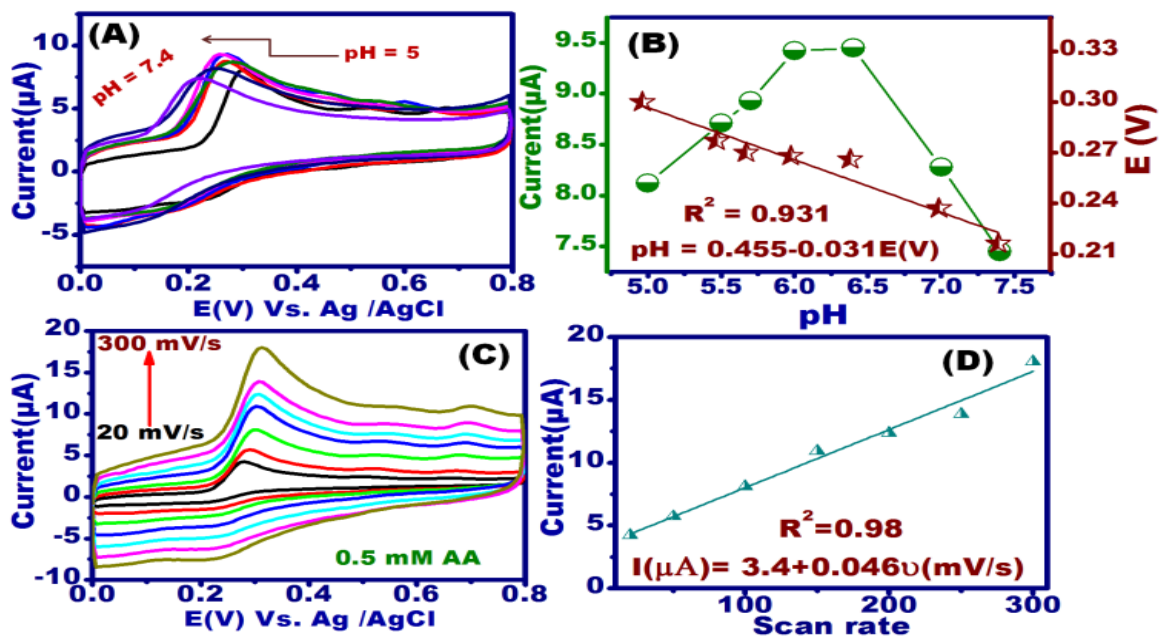

**Figure S1.** A) CVs of 0.5 mM AA at varying supporting electrolyte (PBS) pH values (5-7.4) at a scan rate of 100  $\text{mVs}^{-1}$  on S-MCMS-900- modified electrode. B) The plot of pH versus the current values ( $\mu\text{A}$ ) (olive scatter), and applied potential (V) (wine points). C) The CVs of 0.5 mM AA at varying scan rate (20-300  $\text{mVs}^{-1}$ ) in 0.1 M PBS (pH 6.4) on S-MCMS-900-modified electrode. D) The plot of scan rate ( $\text{mVs}^{-1}$ ) vs the corresponding current ( $\mu\text{A}$ ).

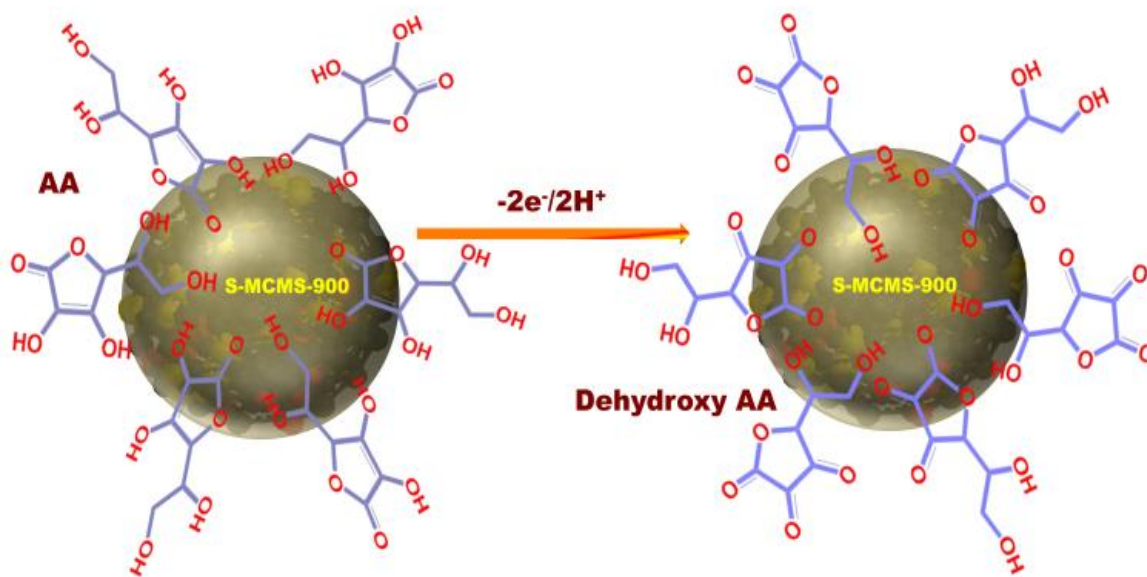

**Scheme S1.** The electro-oxidation mechanism of ascorbic acid (AA) at S-MCMS surfaces illustrates the oxidation of AA to dehydroxy-AA with losing of  $2e^-/2H^+$ .

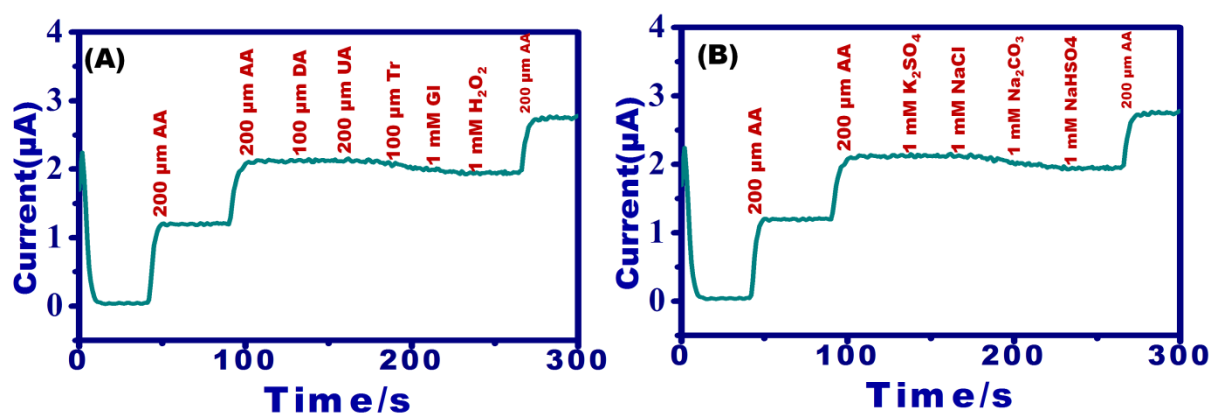

**Figure S2.** A) The amperometric response of 0.2 mM AA and other interfering molecules such as DA, UA, Tr, Gl, and  $H_2O_2$  on the S-MCMS-900-modified electrode at honest applied potential 0.25 V in 0.1 M PBS (pH = 6.4). B) The amperometric response of 0.2 mM AA and other interfering salts such as  $K_2SO_4$ , NaCl,  $Na_2CO_3$ , and NaHSO<sub>4</sub> at honest applied potential 0.25 V in 0.1 M PBS (pH = 6.4).

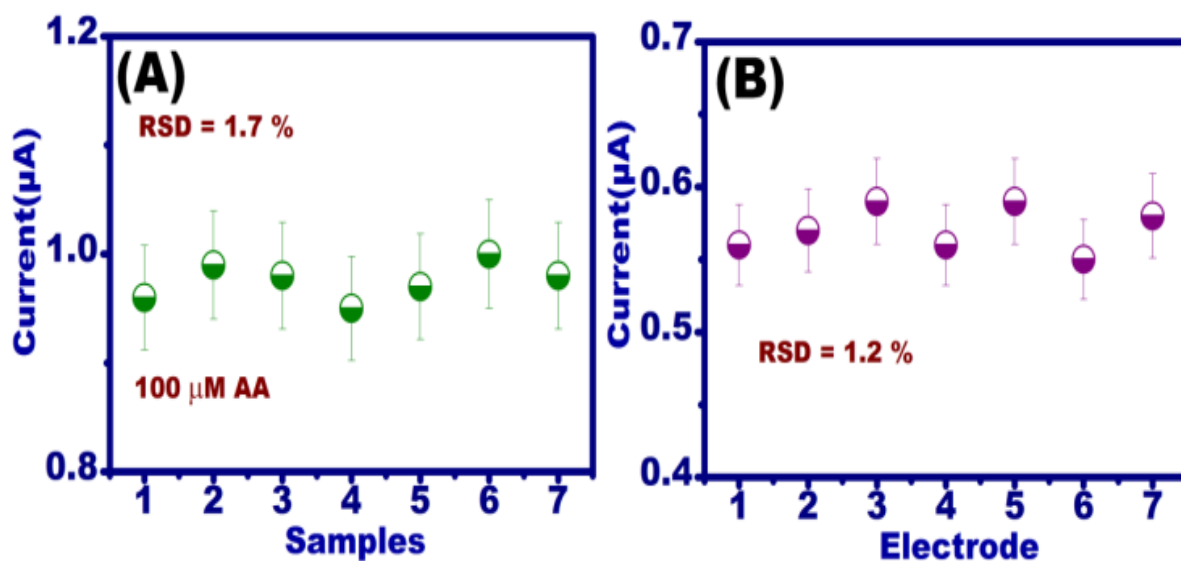

**Figure S3.** The stability of S-MCMS-900-modified electrode over 7 samples of 0.1 mM AA in 0.1 M PBS (pH 6.4) using SWV- measurements. B) The reproducibility of S-MCMS-900 over 7 electrodes of 0.1 mM AA in 0.1 M PBS (pH 6.4) using SWV-

**Table S1.** Comparison of the analytical performance of S-MCMS-900- modified electrode for monitoring of ascorbic acid with other modified electrodes as a function of detection limit and linear range.

| Electrode                            | Ascorbic acid                    |                                   | References         |
|--------------------------------------|----------------------------------|-----------------------------------|--------------------|
|                                      | Linear range (mM)                | Detection limit ( $\mu\text{M}$ ) |                    |
| GSTG/Chitosan(Chit)/GCE <sup>a</sup> | $3 \times 10^{-4}$ - $10^{-2}$   | 0.07                              | <a href="#">7</a>  |
| PdPt/CPE <sup>b</sup>                | 0.31-20                          | 62                                | <a href="#">8</a>  |
| CA/DCPI-CME <sup>c</sup>             | 0.1-6                            | 10                                | <a href="#">9</a>  |
| Co/Si(100)                           | $0.1 \times 10^{-3}$ – $10^{-2}$ | 0.1                               | <a href="#">10</a> |
| PdPt-BANS <sup>d</sup>               | 0.01-0.97                        | 0.2                               | <a href="#">11</a> |

<sup>a</sup> gold nanoparticle (AuNP)-modulated hydrophilic sodium dodecylsulfate (SDS)-wrapped graphene (G)-tolonium chloride (TC)/glassy carbon electrode.

<sup>b</sup> palladium platinum/ carbon paste electrode

<sup>c</sup> cellulose acetate polymeric film bearing 2,6-dichlorophenolindophenol

<sup>d</sup> PdPt bimetallic alloy nanowires

## References

1. b. Xiao-Bo Li a, Md. Mahbubur Rahman b, Guang-Ri Xu a, Jae-Joon Lee, *Electrochim. Acta* 2015, 173
2. H. Ibrahim and Y. Temerk, *J. Electroanal. Chem.* 2016, 780, 176-186.
3. Y. G. Yaru Li, Bo Zheng, Lan Luo, Cong Li, Xiaoyi Yan, Tingting Zhang, Nannan Lu, and Z. Zhang, *Talanta*, 2017, 162, 80–89.
4. N. Akhtar, M. Y. Emran, M. Shenashen, H. Khalifa, T. Osaka, A. Faheem, T. Homma, H. Kawarada and S. El-Safty, *J. Mater. Chem. B*, 2017, 5 (39), 7985-7996.
5. M. Emran, M. Mekawy, N. Akhtar, M. Shenashen, I. EL-Sewify, A. Faheem and S. El-Safty, *Biosens. Bioelectron.* 2018, 100, 122-131.
6. M. Y. Emran, H. Khalifa, H. Gomaa, M. A. Shenashen, N. Akhtar, M. Mekawy, A. Faheem and S. A. El-Safty, *Microchim. Acta*, 2017, 184 (11), 4553-4562
7. H. Kashyap, P. K. Singh, F. Verma, V. K. Rai, A. Rai and M. Singh, *New J. Chem.* 2017, 41, 6489-6496.
8. A. M. Pisoschi, A. Pop, G. P. Negulescu and A. Pisoschi, *Molecules*, 2011, 16, 1349-1365.
9. A. B. Florou, M. I. Prodromidis, M. I. Karayannis and S. M. Tzouwara-Karayanni, *Anal. Chim. Acta*, 2000, 409, 113-121.
10. L. Zhao, K. Liao, M. Pynenburg, L. Wong, N. Heinig, J. P. Thomas and K. Leung, *ACS Appl. mater. interfaces*, 2013, 5, 2410-2416.
11. L. Jin, Z. Zhang, Z. Zhuang, Z. Meng, C. Li and Y. Shen, *RSC Adv.* 2016, 6, 42008-42013.
